# Supplementary material for: Carrier generation and compensation mechanism in La2SnO2S3
Source: Royal Society of Chemistry journal article supplement (doi:10.1039/d4tc01116c), 2024-01-01
Supplement: d4tc01116c1.pdf [file d4tc01116c1.pdf]

## Supplementary information

### Carrier generation and compensation mechanism in $\text{La}_2\text{SnO}_2\text{S}_3$

Teruya Nagafuji,<sup>a</sup> Koshiro Osuna,<sup>a</sup> Kota Hanzawa,<sup>a</sup> Tomoya Gake,<sup>a</sup> Soungmin Bae,<sup>a</sup> Zhongxu Hu,<sup>b</sup> Takayoshi Katase,<sup>b</sup> Akira Takahashi,<sup>a</sup> Hidenori Hiramatsu,<sup>\*ab</sup> and Fumiyasu Oba<sup>\*\*ab</sup>

<sup>a</sup> Laboratory for Materials and Structures, Institute of Innovative Research, Tokyo Institute of Technology, 4259 Nagatsuta, Midori-ku, Yokohama 226-8501, Japan

<sup>b</sup> MDX Research Center for Element Strategy, International Research Frontiers Initiative, Tokyo Institute of Technology, 4259 Nagatsuta, Midori-ku, Yokohama 226-8501, Japan

\* Email: h-hirama@mces.titech.ac.jp

\*\* Email: oba@mssl.titech.ac.jp

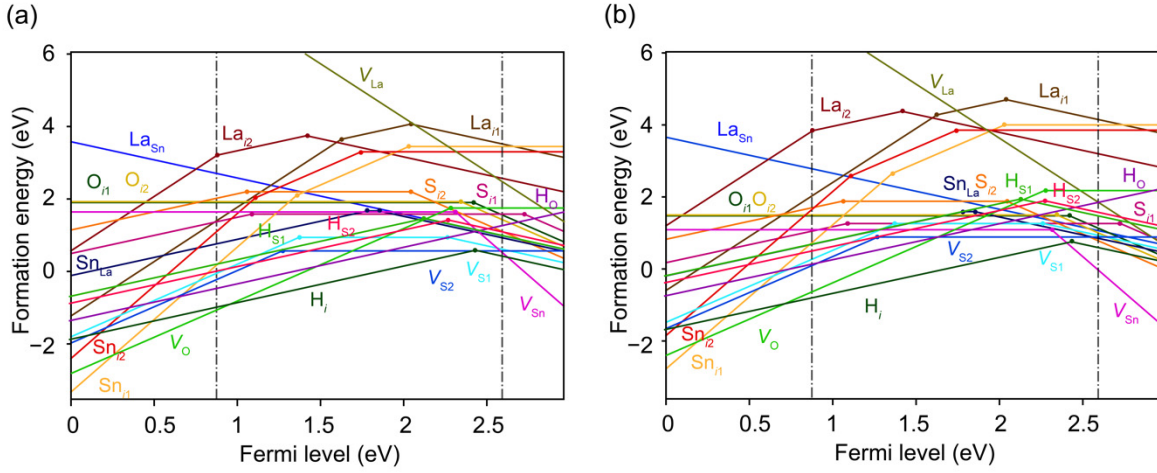

Fig. S1 Formation energies of native defects and H impurities at relevant sites in  $\text{La}_2\text{SnO}_2\text{S}_3$  under (a) the cation-rich conditions [ $\Delta\mu_{\text{La}} = -5.17$ ,  $\Delta\mu_{\text{Sn}} = -0.64$ ,  $\Delta\mu_{\text{O}} = -2.76$ ,  $\Delta\mu_{\text{S}} = -0.37$ , and  $\Delta\mu_{\text{H}} = 0$  (eV)] and (b) the anion-rich conditions [ $\Delta\mu_{\text{La}} = -5.80$ ,  $\Delta\mu_{\text{Sn}} = -1.19$ ,  $\Delta\mu_{\text{O}} = -2.33$ ,  $\Delta\mu_{\text{S}} = -0.05$ , and  $\Delta\mu_{\text{H}} = -0.16$  (eV)], calculated using PBEsol. The upper and lower limits of the Fermi level are expanded from the band edges within the  $2 \times 2 \times 1$  non- $\Gamma$ -centered  $k$ -point mesh used in the PBEsol supercell calculation (the vertical dashed-dotted lines) to those determined by the non-self-consistent HSE ( $\alpha = 0.31$ ) band structure calculation; the Fock-exchange mixing parameter  $\alpha$  has been tuned to reproduce the band gap by the self-consistent HSE06 ( $\alpha = 0.25$ ) calculation.

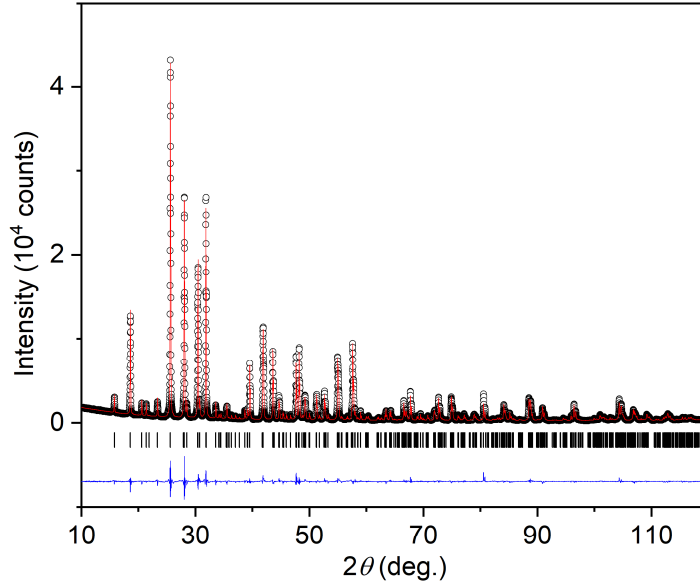

Fig. S2 Results of Rietveld analysis of a polycrystalline  $\text{La}_2\text{SnO}_2\text{S}_3$  sample. The black circles, red curve, black bars, and blue curve denote the original data points, fitted curve, diffraction peak positions, and difference between the original data points and the fitted curve, respectively.

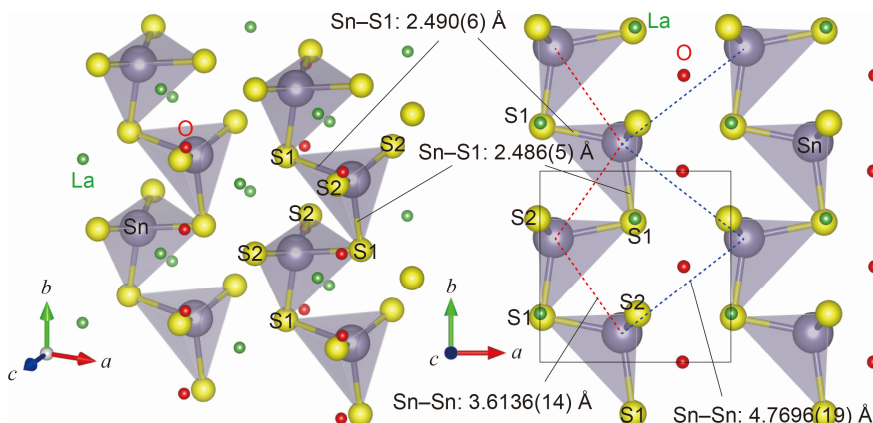

Fig. S3 Crystal structure of  $\text{La}_2\text{SnO}_2\text{S}_3$  drawn from two kinds of viewpoints. La (green) and O (red) are represented in smaller diameters than those in Fig. 9 to clearly show the  $\text{SnS}_4$  tetrahedra. The red and blue dotted lines show the first and second neighboring Sn–Sn distances, respectively. The VESTA code<sup>55</sup> was used for the visualization.

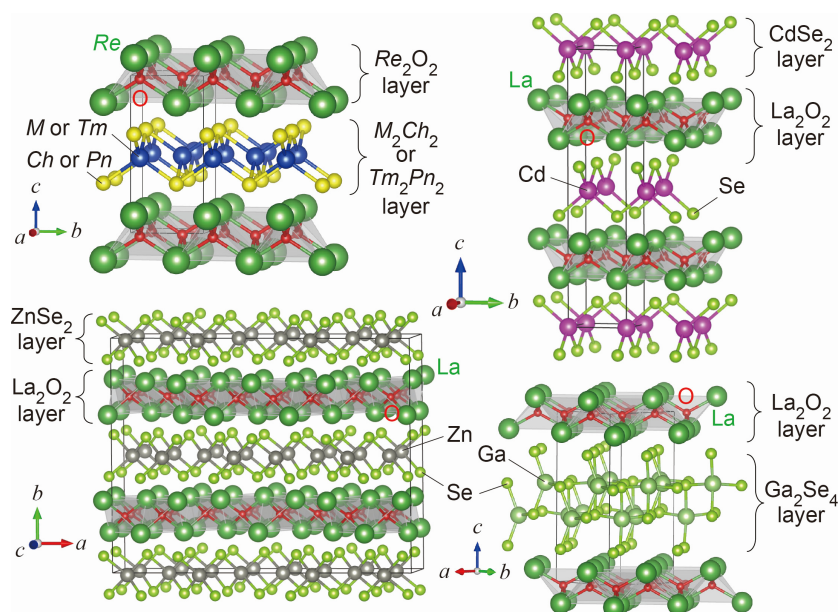

Fig. S4 Crystal structures of  $\text{ReMOCh}$  ( $\text{Re}$  = rare earth, La–Er;  $M$  = monovalent metal, Cu, Ag;  $Ch$  = chalcogen, S–Te),  $\text{ReTmOPn}$  ( $\text{Re}$  = La–Sm;  $Tm$  = 3d or 4d transition metal, Cr–Ni, Zn, Ru, Os;  $Pn$  = pnictogen, P–Sb),  $\text{La}_2\text{CdO}_2\text{Se}_2$ ,  $\text{La}_2\text{ZnO}_2\text{Se}_2$ , and  $\text{LaGaOSe}_2$ . All of these layered quaternary mixed-anion compounds possess a common building block of an edge-sharing rare-earth oxide  $\text{Re}_2\text{O}_2$  tetrahedra layer, which is sandwiched by chalcogenide or pnictide layers. The VESTA code<sup>55</sup> was used for the visualization.

Table S1 Values of the chemical potentials and the competing phases at each limit of the single-phase region of  $\text{La}_2\text{SnO}_2\text{S}_3$  in the La–Sn–O–S–H quinary system from HSE06 hybrid functional calculations.

| Conditions | $\Delta\mu_{\text{La}}$ (eV) | $\Delta\mu_{\text{O}}$ (eV) | $\Delta\mu_{\text{S}}$ (eV) | $\Delta\mu_{\text{Sn}}$ (eV) | $\Delta\mu_{\text{H}}$ (eV) | Competing phases                                                                                                |
|------------|------------------------------|-----------------------------|-----------------------------|------------------------------|-----------------------------|-----------------------------------------------------------------------------------------------------------------|
| A*         | -5.25                        | -2.90                       | -0.52                       | -0.32                        | 0                           | $\text{H}_2$ , $\text{La}_2\text{S}_3$ , $\text{La}_2\text{SO}_2$ , $\text{SnS}$                                |
| B          | -5.27                        | -2.89                       | -0.51                       | -0.33                        | 0                           | $\text{H}_2$ , $\text{La}_2\text{S}_3$ , $\text{La}_2\text{SnS}_5$ , $\text{SnS}$                               |
| C          | -5.67                        | -2.62                       | -0.39                       | -0.45                        | -0.02                       | $\text{H}_2\text{O}$ , $\text{H}_2\text{S}$ , $\text{SnS}$ , $\text{SnS}_2$                                     |
| D          | -5.44                        | -2.81                       | -0.42                       | -0.42                        | 0                           | $\text{H}_2$ , $\text{H}_2\text{S}$ , $\text{La}_2\text{SnS}_5$ , $\text{SnS}$                                  |
| E          | -5.40                        | -2.80                       | -0.42                       | -0.51                        | 0                           | $\text{H}_2$ , $\text{H}_2\text{S}$ , $\text{La}_2\text{S}_3$ , $\text{La}_2\text{SO}_2$                        |
| F          | -5.40                        | -2.81                       | -0.42                       | -0.50                        | 0                           | $\text{H}_2$ , $\text{H}_2\text{S}$ , $\text{La}_2\text{S}_3$ , $\text{La}_2\text{SnS}_5$                       |
| G          | -5.54                        | -2.65                       | -0.42                       | -0.51                        | 0                           | $\text{H}_2$ , $\text{H}_2\text{O}$ , $\text{H}_2\text{S}$ , $\text{La}_2\text{SO}_2$                           |
| H          | -5.59                        | -2.65                       | -0.42                       | -0.42                        | 0                           | $\text{H}_2$ , $\text{H}_2\text{O}$ , $\text{H}_2\text{S}$ , $\text{SnS}$                                       |
| I          | -5.49                        | -2.65                       | -0.52                       | -0.32                        | 0                           | $\text{H}_2$ , $\text{H}_2\text{O}$ , $\text{La}_2\text{SO}_2$ , $\text{SnS}$                                   |
| J**        | -6.15                        | -2.32                       | 0                           | -1.22                        | -0.21                       | $\text{H}_2\text{S}$ , $\text{La}_2\text{SO}_6$ , $\text{LaS}_2$ , $\text{S}$ , $\text{SnS}_2$                  |
| K          | -5.91                        | -2.51                       | -0.12                       | -0.98                        | -0.15                       | $\text{H}_2\text{S}$ , $\text{La}_2\text{SnS}_5$ , $\text{LaS}_2$ , $\text{SnS}_2$                              |
| L          | -6.01                        | -2.36                       | -0.07                       | -1.22                        | -0.18                       | $\text{H}_2\text{S}$ , $\text{La}_2\text{SO}_2$ , $\text{La}_2\text{SO}_6$ , $\text{LaS}_2$ , $\text{LaSO}$     |
| M          | -5.77                        | -2.54                       | -0.19                       | -0.98                        | -0.12                       | $\text{H}_2\text{S}$ , $\text{La}_{10}\text{S}_{19}$ , $\text{La}_2\text{SO}_2$ , $\text{LaS}_2$                |
| N          | -5.77                        | -2.57                       | -0.19                       | -0.91                        | -0.12                       | $\text{H}_2\text{S}$ , $\text{La}_{10}\text{S}_{19}$ , $\text{La}_2\text{SnS}_5$ , $\text{LaS}_2$               |
| O          | -5.51                        | -2.77                       | -0.39                       | -0.45                        | -0.02                       | $\text{H}_2\text{S}$ , $\text{La}_2\text{SnS}_5$ , $\text{SnS}$ , $\text{SnS}_2$                                |
| P          | -5.89                        | -2.36                       | -0.32                       | -0.73                        | -0.15                       | $\text{H}_2\text{O}$ , $\text{La}_2\text{SO}_2$ , $\text{La}_2\text{SO}_6$ , $\text{La}_2\text{Sn}_2\text{O}_7$ |
| Q          | -6.02                        | -2.32                       | -0.26                       | -0.71                        | -0.16                       | $\text{H}_2\text{O}$ , $\text{La}_2\text{SO}_6$ , $\text{La}_2\text{Sn}_2\text{O}_7$ , $\text{SnS}_2$           |
| R          | -5.99                        | -2.36                       | -0.13                       | -1.11                        | -0.15                       | $\text{H}_2\text{O}$ , $\text{H}_2\text{S}$ , $\text{La}_2\text{SO}_2$ , $\text{La}_2\text{SO}_6$               |
| S          | -6.10                        | -2.32                       | -0.09                       | -1.04                        | -0.16                       | $\text{H}_2\text{O}$ , $\text{H}_2\text{S}$ , $\text{La}_2\text{SO}_6$ , $\text{SnS}_2$                         |
| T          | -5.65                        | -2.63                       | -0.26                       | -0.85                        | -0.08                       | $\text{H}_2\text{S}$ , $\text{La}_{10}\text{S}_{19}$ , $\text{La}_2\text{S}_3$ , $\text{La}_2\text{SO}_2$       |
| U          | -5.65                        | -2.64                       | -0.26                       | -0.83                        | -0.08                       | $\text{H}_2\text{S}$ , $\text{La}_{10}\text{S}_{19}$ , $\text{La}_2\text{S}_3$ , $\text{La}_2\text{SnS}_5$      |
| V          | -5.58                        | -2.56                       | -0.52                       | -0.32                        | -0.05                       | $\text{H}_2\text{O}$ , $\text{La}_2\text{SO}_2$ , $\text{La}_2\text{Sn}_2\text{O}_7$ , $\text{SnS}$             |
| W          | -5.83                        | -2.45                       | -0.39                       | -0.45                        | -0.10                       | $\text{H}_2\text{O}$ , $\text{La}_2\text{Sn}_2\text{O}_7$ , $\text{SnS}$ , $\text{SnS}_2$                       |

\* The cation-rich conditions.

\*\* The anion-rich conditions.

Table S2 Values of the chemical potentials and the competing phases at each limit of the single-phase region of  $\text{La}_2\text{SnO}_2\text{S}_3$  in the La–Sn–O–S quaternary system from HSE06 hybrid functional calculations.

| Conditions | $\Delta\mu_{\text{La}}$ (eV) | $\Delta\mu_{\text{O}}$ (eV) | $\Delta\mu_{\text{S}}$ (eV) | $\Delta\mu_{\text{Sn}}$ (eV) | Competing phases                                                                         |
|------------|------------------------------|-----------------------------|-----------------------------|------------------------------|------------------------------------------------------------------------------------------|
| A          | −5.27                        | −2.89                       | −0.51                       | −0.33                        | $\text{La}_2\text{S}_3$ , $\text{La}_2\text{SnS}_5$ , SnS                                |
| B          | −5.65                        | −2.64                       | −0.26                       | −0.83                        | $\text{La}_{10}\text{S}_{19}$ , $\text{La}_2\text{S}_3$ , $\text{La}_2\text{SnS}_5$      |
| C          | −5.51                        | −2.77                       | −0.39                       | −0.45                        | $\text{La}_2\text{SnS}_5$ , SnS, $\text{SnS}_2$                                          |
| D          | −5.77                        | −2.57                       | −0.19                       | −0.91                        | $\text{La}_{10}\text{S}_{19}$ , $\text{La}_2\text{SnS}_5$ , $\text{LaS}_2$               |
| E          | −5.91                        | −2.51                       | −0.12                       | −0.98                        | $\text{La}_2\text{SnS}_5$ , $\text{LaS}_2$ , $\text{SnS}_2$                              |
| F*         | −6.15                        | −2.32                       | 0                           | −1.22                        | $\text{La}_2\text{SO}_6$ , $\text{LaS}_2$ , S, $\text{SnS}_2$                            |
| G          | −6.14                        | −2.32                       | 0                           | −1.22                        | $\text{La}_2\text{SO}_6$ , $\text{LaS}_2$ , $\text{SnS}_2$                               |
| H          | −5.65                        | −2.63                       | −0.26                       | −0.85                        | $\text{La}_{10}\text{S}_{19}$ , $\text{La}_2\text{S}_3$ , $\text{La}_2\text{SO}_2$       |
| I          | −5.77                        | −2.54                       | −0.19                       | −0.98                        | $\text{La}_{10}\text{S}_{19}$ , $\text{La}_2\text{SO}_2$ , $\text{LaS}_2$                |
| J          | −6.01                        | −2.36                       | −0.07                       | −1.22                        | $\text{La}_2\text{SO}_2$ , $\text{La}_2\text{SO}_6$ , $\text{LaS}_2$ , $\text{LaSO}$     |
| K**        | −5.25                        | −2.90                       | −0.52                       | −0.32                        | $\text{La}_2\text{S}_3$ , $\text{La}_2\text{SO}_2$ , SnS                                 |
| L          | −5.58                        | −2.56                       | −0.52                       | −0.32                        | $\text{La}_2\text{SO}_2$ , $\text{La}_2\text{Sn}_2\text{O}_7$ , SnS                      |
| M          | −5.89                        | −2.36                       | −0.32                       | −0.73                        | $\text{La}_2\text{SO}_2$ , $\text{La}_2\text{SO}_6$ , $\text{La}_2\text{Sn}_2\text{O}_7$ |
| N          | −5.83                        | −2.45                       | −0.39                       | −0.45                        | $\text{La}_2\text{Sn}_2\text{O}_7$ , SnS, $\text{SnS}_2$                                 |
| O          | −6.02                        | −2.32                       | −0.26                       | −0.71                        | $\text{La}_2\text{SO}_6$ , $\text{La}_2\text{Sn}_2\text{O}_7$ , $\text{SnS}_2$           |

\* The anion-rich conditions.

\*\* The cation-rich conditions.

Table S3 Thermodynamic transition levels  $\epsilon(q/q')$  of the selected native defects and the H interstitial in reference to the VBM from HSE06 hybrid functional calculations.

|                  | $q/q'$ | $\epsilon(q/q')$ (eV) |
|------------------|--------|-----------------------|
| $\text{Sn}_{i1}$ | 4+/2+  | 1.15                  |
|                  | 2+/0   | 1.66                  |
| $\text{Sn}_{i2}$ | 4+/2+  | 0.81                  |
|                  | 2+/0   | 1.63                  |
| $V_{\text{O}}$   | 2+/0   | 2.16                  |
|                  | 0/2-   | 2.60                  |
| $V_{\text{S1}}$  | 2+/0   | 0.98                  |
|                  | 0/2-   | 2.24                  |
| $V_{\text{S2}}$  | 2+/0   | 1.02                  |
|                  | 0/2-   | 2.56                  |
| $V_{\text{Sn}}$  | 0/2-   | 1.91                  |
|                  | 2-/4-  | 1.98                  |
| $\text{H}_i$     | +/-    | 2.41                  |

Table S4 Lattice parameters determined by WPPF (Whole Powder Pattern Fitting) analysis and reliability ( $R$ )-factors obtained by Rietveld refinements for  $\text{La}_2\text{SnO}_2\text{S}_3$ . Values in the parentheses of lattice parameters are standard deviations in the last digit.

|                                 |                                     |
|---------------------------------|-------------------------------------|
| Chemical formula                | $\text{La}_2\text{SnO}_2\text{S}_3$ |
| Crystal system                  | Orthorhombic                        |
| Space group                     | $Pbnm$ (No. 62)                     |
| Refined $2\theta$ region (deg.) | 10 – 120                            |
| $a$ (Å)                         | 5.86215(17)                         |
| $b$ (Å)                         | 5.87512(17)                         |
| $c$ (Å)                         | 19.0666(5)                          |
| $R_{\text{wp}}$ (%)             | 6.35                                |
| $R_{\text{p}}$ (%)              | 4.69                                |
| $S$                             | 1.95                                |

Table S5 Refined structure parameters for  $\text{La}_2\text{SnO}_2\text{S}_3$ . Values in parentheses are standard deviations in the last digit.

| Atom | Site | Occupancy | $x$         | $y$         | $z$        | $B$ (Å <sup>2</sup> ) |
|------|------|-----------|-------------|-------------|------------|-----------------------|
| La   | $8d$ | 1.00      | 0.00225(15) | 0.25221(11) | 0.06368(2) | 0.024(10)             |
| Sn   | $4c$ | 1.00      | 0.4295(2)   | 0.1523(2)   | 1/4        | 0.99(2)               |
| O    | $8d$ | 1.00      | 0.2467(12)  | 0.4992(15)  | -0.0002(4) | 0.15(10)              |
| S1   | $4c$ | 1.00      | 0.0125(10)  | 0.2332(8)   | 1/4        | 0.77(3)               |
| S2   | $8d$ | 1.00      | 0.5117(6)   | 0.2509(5)   | 0.13536(9) | 0.77(3)               |

Table S6 Summary of structure parameters for SnS<sub>2</sub>, SnS, and La<sub>2</sub>SnO<sub>2</sub>S<sub>3</sub>.

| Formula                      | SnS <sub>2</sub>                                                                                         | SnS                                                                                  |                                                                                                                               | La <sub>2</sub> SnO <sub>2</sub> S <sub>3</sub>                                                                                                                                                                                                  |                                                                                                                                                                                                                                                                                                                                                                                                    |
|------------------------------|----------------------------------------------------------------------------------------------------------|--------------------------------------------------------------------------------------|-------------------------------------------------------------------------------------------------------------------------------|--------------------------------------------------------------------------------------------------------------------------------------------------------------------------------------------------------------------------------------------------|----------------------------------------------------------------------------------------------------------------------------------------------------------------------------------------------------------------------------------------------------------------------------------------------------------------------------------------------------------------------------------------------------|
| Structure type               | CdI <sub>2</sub>                                                                                         | GeS                                                                                  |                                                                                                                               | –                                                                                                                                                                                                                                                |                                                                                                                                                                                                                                                                                                                                                                                                    |
| Space group                  | $\bar{P}3m1$ (No. 164)                                                                                   | $Pnma$ (No. 62)                                                                      |                                                                                                                               | $Pbnm$ (No. 62)                                                                                                                                                                                                                                  |                                                                                                                                                                                                                                                                                                                                                                                                    |
| Crystal system               | Trigonal                                                                                                 | Orthorhombic                                                                         |                                                                                                                               | Orthorhombic                                                                                                                                                                                                                                     |                                                                                                                                                                                                                                                                                                                                                                                                    |
| Formal charge of Sn          | +4                                                                                                       | +2                                                                                   |                                                                                                                               | +4                                                                                                                                                                                                                                               |                                                                                                                                                                                                                                                                                                                                                                                                    |
| Coordination number of Sn    | 6                                                                                                        | 3                                                                                    | 6                                                                                                                             | 4                                                                                                                                                                                                                                                | 6                                                                                                                                                                                                                                                                                                                                                                                                  |
| Connectivity of Sn polyhedra | Edge sharing ( $\parallel a, b$ )                                                                        | Corner sharing ( $\parallel b, c$ )                                                  | Edge sharing ( $\parallel b, c$ )                                                                                             | Corner sharing ( $\parallel b$ )                                                                                                                                                                                                                 | Edge sharing ( $\parallel ab$ )                                                                                                                                                                                                                                                                                                                                                                    |
| Sn–S (Å)                     | 2.5601(11)×6                                                                                             | 2.622(3)×1<br>2.6618(19)×2                                                           | 2.622(3)×1<br>2.6618(19)×2<br>3.287(3)×2<br>3.385(3)×1                                                                        | Sn–S2: 2.312(2)×2<br>Sn–S1: 2.486(5)×1 ( $\parallel ab$ )<br>Sn–S1: 2.490(6)×1 ( $\parallel ab$ )                                                                                                                                                | Sn–S2: 2.312(2)×2<br>Sn–S1: 2.486(5)×1 ( $\parallel ab$ )<br>Sn–S1: 2.490(6)×1 ( $\parallel ab$ )<br>Sn–S1: 3.430(5)×1 ( $\parallel ab$ )<br>Sn–S1: 3.451(6)×1 ( $\parallel ab$ )                                                                                                                                                                                                                  |
| Bond valence sum (BVS) of Sn | 3.9                                                                                                      | 1.6                                                                                  | 1.9                                                                                                                           | 4.1                                                                                                                                                                                                                                              | 4.2                                                                                                                                                                                                                                                                                                                                                                                                |
| S–Sn–S (deg.)                | 89.20(5)×6<br>90.80(5)×6<br>180.0000(0)×3                                                                | 89.02(6)×2<br>96.83(9)×1                                                             | 89.02(6)×2<br>96.83(9)×1<br>76.71(6)×2<br>79.11(7)×2<br>117.01(5)×2<br>92.78(6)×2<br>74.55(7)×1<br>162.66(8)×2<br>161.98(4)×1 | S1–Sn–S2: 99.02(10)×2<br>S1–Sn–S2: 102.69(9)×2<br>S1–Sn–S1: 108.87(17)×1 ( $\parallel ab$ )<br>S2–Sn–S2: 141.96(17)×1                                                                                                                            | S1–Sn–S2: 99.02(10)×2<br>S1–Sn–S2: 102.69(9)×2<br>S1–Sn–S1: 108.87(17)×1 ( $\parallel ab$ )<br>S2–Sn–S2: 141.96(17)×1<br>S1–Sn–S2: 74.34(8)×2<br>S1–Sn–S2: 76.06(10)×2<br>S1–Sn–S1: 76.39(14)×1 ( $\parallel ab$ )<br>S1–Sn–S1: 84.69(18)×1 ( $\parallel ab$ )<br>S1–Sn–S1: 90.06(14)×1 ( $\parallel ab$ )<br>S1–Sn–S1: 161.08(19)×1 ( $\parallel ab$ )<br>S1–Sn–S1: 166.4(3)×1 ( $\parallel ab$ ) |
| Sn–Sn (Å)                    | 3.6456(5) ( $\parallel a, b$ )<br>5.8934(12) ( $\parallel c$ )                                           | 3.4867(16)<br>3.982(3) ( $\parallel b$ )<br>4.1450(17)<br>4.329(3) ( $\parallel c$ ) |                                                                                                                               | 3.6136(14) ( $\parallel ab$ )<br>4.7696(19) ( $\parallel ab$ )<br>9.7350(6) ( $\cong \parallel c$ )<br>10.0396(4) ( $\cong \parallel c$ )                                                                                                        |                                                                                                                                                                                                                                                                                                                                                                                                    |
| S–S (Å)                      | 3.595(3)×6 ( $\cong \parallel c$ )<br>3.6456(5)×6 ( $\parallel ab$ )<br>3.647(3) ( $\cong \parallel c$ ) | 3.704(3)×4<br>3.891(5)×2<br>3.982(3)×2<br>4.329(3)×2<br>5.690(5)×2                   |                                                                                                                               | S1–S2: 3.581(5)×2<br>S1–S2: 3.654(6)×2<br>S1–S2: 3.662(6)×2<br>S1–S2: 3.748(5)×2<br>S1–S1: 4.048(9)×2 ( $\parallel ab$ )<br>S2–S2: 4.054(5)×1 ( $\parallel ab$ )<br>S1–S1: 4.255(9)×2 ( $\parallel ab$ )<br>S2–S2: 4.248(6)×1 ( $\parallel ab$ ) |                                                                                                                                                                                                                                                                                                                                                                                                    |
| O–La (Å)                     | –                                                                                                        | –                                                                                    |                                                                                                                               | 2.375(8)×1<br>2.393(8)×1<br>2.421(8)×1<br>2.427(8)×1                                                                                                                                                                                             |                                                                                                                                                                                                                                                                                                                                                                                                    |
| La–O–La (deg.)               | –                                                                                                        | –                                                                                    |                                                                                                                               | 104.4(3)×1<br>104.5(4)×1<br>104.8(4)×1<br>105.3(3)×1<br>118.9(4)×1<br>119.7(4)×1                                                                                                                                                                 |                                                                                                                                                                                                                                                                                                                                                                                                    |
| La–S (Å)                     | –                                                                                                        | –                                                                                    |                                                                                                                               | 3.184(4)×1<br>3.234(3)×1<br>3.248(3)×1<br>3.284(4)×1                                                                                                                                                                                             |                                                                                                                                                                                                                                                                                                                                                                                                    |
| S–La–S (deg.)                | –                                                                                                        | –                                                                                    |                                                                                                                               | 78.14(9)×1<br>78.34(9)×1<br>81.12(9)×1<br>81.33(9)×1<br>129.99(6)×1<br>130.02(6)×1                                                                                                                                                               |                                                                                                                                                                                                                                                                                                                                                                                                    |
| Reference                    | 53 (ICSD Collection Code 252197)                                                                         | 54 (ICSD Collection Code 24376)                                                      |                                                                                                                               | This work                                                                                                                                                                                                                                        |                                                                                                                                                                                                                                                                                                                                                                                                    |
